# Supplementary material for: Genome-Wide Analysis of SRNF Genes in Gossypium hirsutum Reveals the Role of GhSRNF18 in Primary Root Growth
Source: Front Plant Sci. 2021 Sep 22;12:731834. doi: 10.3389/fpls.2021.731834 (PMC8494181; doi:10.3389/fpls.2021.731834)
Supplement: Supplementary file 1 [file Data_Sheet_1.xlsx]

## Sheet: Table S1
	Supplementary Table 1. Primers for GhSRNF18 expression and binary constrcuction
	Name of primers	Primer sequences (from 5' to 3')
	GhSRNF18-RT-F	CTTCGGAACCCGGAGATGAA
	GhSRNF18-RT-R	AGACAACGAGGACATCCCAC
	GhUBQ7-RT-F	GAAGGCATTCCACCTGACCAAC
	GhUBQ7-RT-R	CTTGACCTTCTTCTTCTTGTGCTTG
	GhSRNF18-GFP-F	ACGGGGGACGAGCTCGGTACCATGTCAGTTTCTCCCCAGGAAA
	GhSRNF18-GFP-R	GCCCTTGCTCACCATGTCGACTCAATTGCTTGCCCATTTAG
	GhSRNF18-VIGs-F	GTGAGTAAGGTTACCGAATTCATGTCAGTTTCTCCCCAGGAAATATC
	GhSRNF18-VIGs-R	GAGACGCGTGAGCTCGGTACCTCAATTGCTTGCCCATTTAGCAG

## Sheet: Table S2
	Supplementary Table 2. Basic information of SRNF family genes in G. arboreum, G. raimondii, G. hirsutum.
	Gene name	Locus ID	Chromosome	Location	Strand	Protein Length	pI	Molecular Weight(Da)	Short RING-LIKE Zinc-Finger	Subcellular Location
	GaSRNF1	Gar01G17420	A01	57354438-57354797	+	121	8.34	12988.8	76-104	Neucleus
	GaSRNF2	Gar02G03370	A02	3707067-3707414	+	117	8.95	12650.7	75-103	Neucleus
	GaSRNF3	Gar04G12410	A04	68489222-68489554	+	112	8.25	11815.5	67-95	Chloroplast
	GaSRNF4	Gar05G08230	A05	7279750 -7280079	-	111	8.68	11738.5	71-99	Chloroplast
	GaSRNF5	Gar05G33230	A05	40826227-40826968	+	162	5.55	17919.3	118-147	Neucleus
	GaSRNF6	Gar07G13630	A07	21892711-21893046	+	113	5.76	12345.2	73-101	Neucleus
	GaSRNF7	Gar08G01180	A08	895587-895850	+	89	4.34	9834.25	49-77	Neucleus
	GaSRNF8	Gar09G13170	A09	67915695-67916036	+	115	6.25	12482.2	75-103	Neucleus
	GaSRNF9	Gar11G43050	A11	130079636-130079953	-	107	4.8	11145.7	71-100	Neucleus
	GaSRNF10	Gar13G01040	A13	953670-954428	-	176	5.84	19189.4	135-164	Neucleus
	GaSRNF11	Gar13G01050	A13	961906-962703	-	185	4.9	20429.7	144-173	Neucleus
	GaSRNF12	GarUnG11330	Contig934	93066-93416	+	117	8.93	12527.4	74-102	Chloroplast
	GrSRNF1	pred_00023410	D01	29577714-29577865	-	169	8.47	18454.1	76-104	Chloroplast
	GrSRNF2	pred_00024304	D01	53648741-53649088	-	116	8.69	12535.5	75-103	Chloroplast
	GrSRNF3	pred_00037487	D04	53648741-53649088	+	111	8.33	11799.4	75-103	Chloroplast
	GrSRNF4	pred_00000901	D05	6101404-6101733	-	110	8.91	11739.6	71-99	Chloroplast
	GrSRNF5	pred_00034666	D07	14927908-14928736	+	111	6.55	12310.2	72-100	Nucleus
	GrSRNF6	pred_00028897	D09	28800029-28800370	+	114	5.43	12476.4	75-103	Chloroplast
	GrSRNF7	pred_00018726	D13	779384-779483	-	161	5.01	17688.8	120-149	Nucleus
	GrSRNF8	pred_00018727	D13	787137-787526	-	182	4.43	19995	141-169	Nucleus
	GhSRNF1	GH_A01G2205	At01	114481891-114482238	-	117	8.95	12620.6	70-103	Neucleus
	GhSRNF2	GH_A04G0743	At04	47571378-47571710	+	112	8.25	11849.5	62-95	Chloroplast
	GhSRNF3	GH_A05G0808	At05	7280291-7280620	-	111	8.95	11838.6	66-99	Neucleus
	GhSRNF4	GH_A07G1217	At07	19915316-19915651	+	113	5.76	12317.1	68-101	Neucleus
	GhSRNF5	GH_A08G0106	At08	769283-769543	+	88	4.34	9721.09	43-76	Neucleus
	GhSRNF6	GH_A09G1150	At09	64762594-64762935	+	115	6.25	12482.2	70-103	Neucleus
	GhSRNF7	GH_A09G1522	At09	71450560-71450910	-	118	8.93	12527.4	69-102	Chloroplast
	GhSRNF8	GH_A11G3636	At11	120250765-120251079	-	106	4.64	10992.5	66-99	Neucleus
	GhSRNF9	GH_A13G0097	At13	1003415-1004174	-	176	5.29	19179.29	130-164	Neucleus
	GhSRNF10	GH_A13G0098	At13	1010017-1010813	-	185	4.68	20427.6	139-173	Neucleus
	GhSRNF11	GH_A13G0100	At13	1028642-1029349	-	159	7.58	17710.28	112-145	Neucleus
	GhSRNF12	GH_A13G0101	At13	1030064-1030815	-	172	5.28	19194	130-164	Neucleus
	GhSRNF13	GH_D01G1474	Dt01	31329606-31329965	-	121	8.95	12987.9	71-104	Neucleus
	GhSRNF14	GH_D01G2287	Dt01	61619657-61620004	-	117	8.95	12634.7	70-103	Neucleus
	GhSRNF15	GH_D04G0985	Dt04	29820176-29820508	+	112	8.68	11847.5	62-95	Chloroplast
	GhSRNF16	GH_D05G0800	Dt05	6489904 -6490233	-	111	8.91	11715.6	66-99	Chloroplast
	GhSRNF17	GH_D07G1198	Dt07	15561433-15561765	+	112	6.55	12310.2	67-100	Neucleus
	GhSRNF18	GH_D08G0109	Dt08	783557-783811	+	86	4.64	9345.79	41-74	Neucleus
	GhSRNF19	GH_D09G1105	Dt09	36699034-36699375	+	115	5.43	12448.3	75-103	Chloroplast
	GhSRNF20	GH_D09G1474	Dt09	41597231-41597581	-	118	8.93	12527.4	69-102	Chloroplast
	GhSRNF21	GH_D11G3663	Dt11	70346800-70347126	-	109	5.02	11614.3	66-100	Neucleus
	GhSRNF22	GH_D13G0101	Dt13	864468-865222	-	176	5.29	19265.4	130-164	Neucleus
	GhSRNF23	GH_D13G0102	Dt13	872504-873293	-	182	4.43	19964.9	136-170	Neucleus
	GhSRNF24	GH_D13G0104	Dt13	885627-886367	-	168	5.11	18610.2	127-160	Neucleus
	Location: start position-end position. Strand: (+) means positive-sense strand of chromosome, (-) means antisense strand of chomosome.
